# Supplementary material
Source: Springer Nature journal article supplement (https://www.springermedizin.de/resource/supplementary/12936_2014_3370_MOESM9_ESM.pdf/9545746)

**Additional file 9. Effects of pirimiphos-methyl and lambda-cyhalothrin on *An. funestus***

Legend: See Figure 3.

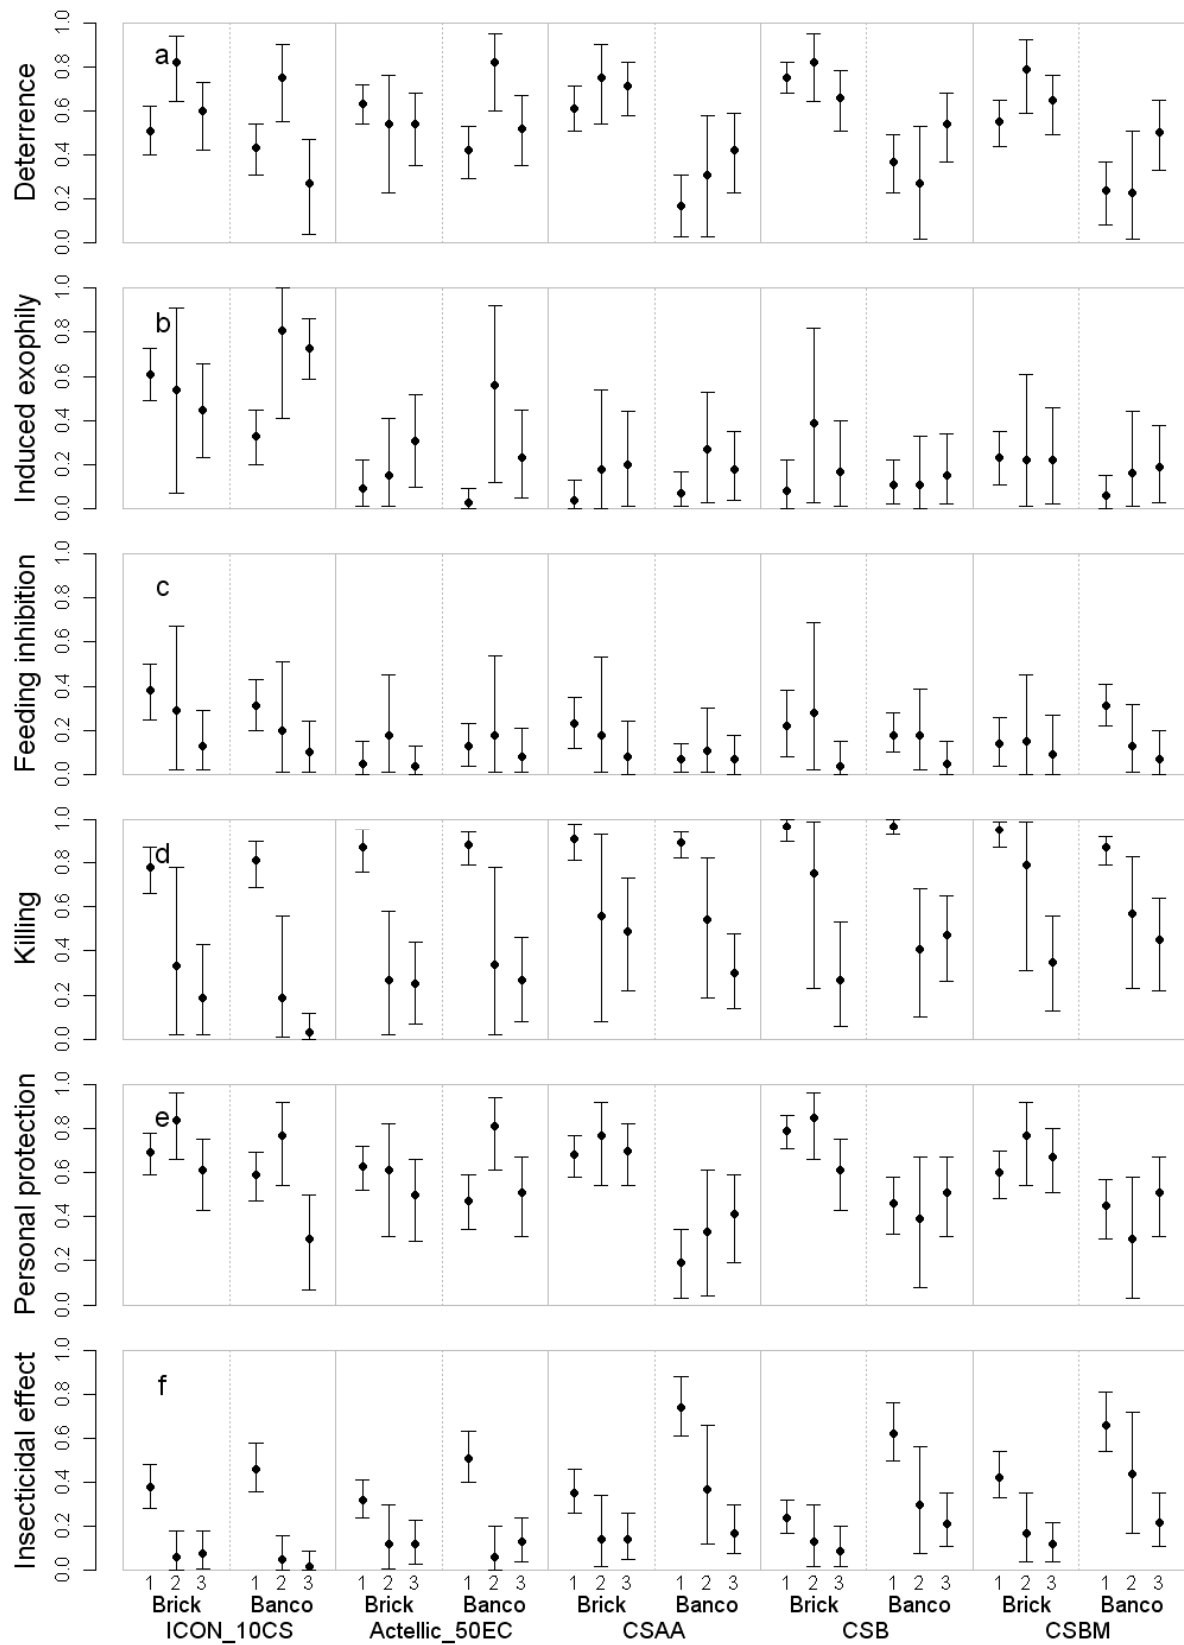

Supplement: MOESM9 [file 9545746]
